# Supplementary material
Source: PubMed Central journal article supplement (PMC9063924)
Supplement: NIHMS1661836-supplement-3.pdf [file NIHMS1661836-supplement-3.pdf]

Supplementary Table 1. RTK fusion tumor stage by microsatellite status at diagnosis and during disease course.

| Microsatellite status | Total number of patients | Stage IV at presentation | Statistics (stage IV at presentation)* | Progression to stage IV | Patients with stage IV at any time point | Statistics (stage IV at any time point)* |
|-----------------------|--------------------------|--------------------------|----------------------------------------|-------------------------|------------------------------------------|------------------------------------------|
| MSS                   | 4                        | 3                        | Chi-square statistic 2.47, p = 0.09    | 1                       | 4                                        | Chi-square statistic 6, p = 0.01         |
| MMR-D                 | 8                        | 2                        |                                        | 0                       | 2                                        |                                          |

\* Statistics compares stage distribution at diagnosis or at any time point during the clinical course between MMR-D and MSS tumors with RTK fusion.

Supplementary Table 2. Genomic classification of patients with MMR-D CRC who underwent OncoPanel testing. “Unclear category” includes patients who did not receive full testing (germline and *MLH1* hypermethylation) or who have no clear category despite receiving all available testing.

| Identifier                                                              | Number of cases |
|-------------------------------------------------------------------------|-----------------|
| <i>BRAF</i> V600E mutated                                               | 42              |
| Lynch syndrome                                                          | 29              |
| Fusion associated                                                       | 8               |
| MLH1 promoter hypermethylation+ NOS (no <i>BRAF</i> mutation or fusion) | 11              |
| Somatic MMR gene mutation                                               | 9               |
| Presumed Lynch syndrome                                                 | 3               |
| Unclear category                                                        | 22              |
| <b>Total MMR-D cases with OncoPanel</b>                                 | <b>124</b>      |

Supplementary Table 3. List of all non-synonymous mutations identified in the alectinib-resistant sample (xenograft line) by targeted genomic testing (alphabetized by gene symbol).

| Gene   | Analysis tool name | Variant classification | Protein change | cDNA change             | Category | Allele fraction | Coverage |
|--------|--------------------|------------------------|----------------|-------------------------|----------|-----------------|----------|
| ALK    | MuTect             | Missense               | p.L1196Q       | c.3587T>A               | COSMIC   | 0.3291          | 939      |
| ARID1A | MuTect             | Missense               | p.A226P        | c.676G>C                | NOVEL    | 0.0427          | 726      |
| ARID1A | MuTect             | Missense               | p.P227Q        | c.680C>A                | NOVEL    | 0.0461          | 737      |
| ARID1A | Phased variant     | Missense               | p.S317G        | c.949_951delAGTinsGGC   | NOVEL    | 0.0513          | 195      |
| ARID1B | MuTect             | Missense               | p.M266L        | c.796A>T                | NOVEL    | 0.2658          | 79       |
| ARID1B | Phased variant     | Missense               | p.M479L        | c.1435_1437delATGinsCTA | NOVEL    | 0.0629          | 365.5    |
| NSD1   | MuTect             | Missense               | p.S51P         | c.151T>C                | NOVEL    | 0.0971          | 917      |
| PHOX2B | MuTect             | Missense               | p.S172L        | c.515C>T                | NOVEL    | 0.4455          | 220      |
| RNF43  | GATK               | Frameshift             | p.A23Rfs*29    | c.65_66dupAG            | NOVEL    | 0.8834          | 1029     |
| TLX3   | Phased variant     | Missense               | p.T55A         | c.163_165delACAIinsGCG  | NOVEL    | 0.0738          | 562      |
| TP53   | MuTect             | Missense               | p.R273C        | c.817C>T                | COSMIC   | 1               | 827      |

Supplementary Table 4. Deidentified genie patient IDs and group assignment for cases used in our study.

| genie_patient_id  | genie_sample_id        | group           | fusion |
|-------------------|------------------------|-----------------|--------|
| GENIE-DFCI-002138 | GENIE-DFCI-002138-4207 | MSI-H-BRAFV600E | NA     |
| GENIE-DFCI-007518 | GENIE-DFCI-007518-3870 | MSI-H-Lynch     | NA     |
| GENIE-DFCI-002491 | GENIE-DFCI-002491-4412 | MSI-H-Lynch     | NA     |
| GENIE-DFCI-006447 | GENIE-DFCI-006447-4426 | MSI-H-Lynch     | NA     |
| GENIE-DFCI-007275 | GENIE-DFCI-007275-5110 | MSI-H-BRAFV600E | NA     |
| GENIE-DFCI-003366 | GENIE-DFCI-003366-4666 | MSI-H-BRAFV600E | NA     |
| GENIE-DFCI-007716 | GENIE-DFCI-007716-3954 | MSI-H-Lynch     | NA     |
| GENIE-DFCI-008105 | GENIE-DFCI-008105-7479 | MSI-H-BRAFV600E | NA     |
| GENIE-DFCI-008343 | GENIE-DFCI-008343-5430 | MSI-H-Lynch     | NA     |
| GENIE-DFCI-002898 | GENIE-DFCI-002898-7501 | MSI-H-BRAFV600E | NA     |
| GENIE-DFCI-008662 | GENIE-DFCI-008662-7261 | MSI-H-BRAFV600E | NA     |
| GENIE-DFCI-008391 | GENIE-DFCI-008391-5705 | MSI-H-Lynch     | NA     |
| GENIE-DFCI-001715 | GENIE-DFCI-001715-7791 | MSI-H-BRAFV600E | NA     |
| GENIE-DFCI-010088 | GENIE-DFCI-010088-9592 | MSI-H-BRAFV600E | NA     |

|                   |                         |                 |      |
|-------------------|-------------------------|-----------------|------|
| GENIE-DFCI-009315 | GENIE-DFCI-009315-6400  | MSI-H-Lynch     | NA   |
| GENIE-DFCI-000581 | GENIE-DFCI-000581-8947  | MSI-H-BRAFV600E | NA   |
| GENIE-DFCI-008284 | GENIE-DFCI-008284-6855  | MSI-H-Lynch     | NA   |
| GENIE-DFCI-010081 | GENIE-DFCI-010081-8432  | MSI-H-Lynch     | NA   |
| GENIE-DFCI-007921 | GENIE-DFCI-007921-6428  | MSI-H-BRAFV600E | NA   |
| GENIE-DFCI-001271 | GENIE-DFCI-001271-7945  | MSI-H-BRAFV600E | NA   |
| GENIE-DFCI-001632 | GENIE-DFCI-001632-7453  | MSS-MAPK        | ROS1 |
| GENIE-DFCI-006237 | GENIE-DFCI-006237-10634 | MSI-H-Lynch     | NA   |
| GENIE-DFCI-025866 | GENIE-DFCI-025866-36004 | MSI-H-Lynch     | NA   |
| GENIE-DFCI-010288 | GENIE-DFCI-010288-10337 | MSI-H-BRAFV600E | NA   |
| GENIE-DFCI-036570 | GENIE-DFCI-036570-74466 | MSI-H-MAPK      | NTRK |
| GENIE-DFCI-010561 | GENIE-DFCI-010561-8376  | MSI-H-BRAFV600E | NA   |
| GENIE-DFCI-011695 | GENIE-DFCI-011695-10716 | MSI-H-BRAFV600E | NA   |
| GENIE-DFCI-010400 | GENIE-DFCI-010400-9865  | MSI-H-BRAFV600E | NA   |
| GENIE-DFCI-002769 | GENIE-DFCI-002769-9861  | MSI-H-BRAFV600E | NA   |

|                   |                          |                 |       |
|-------------------|--------------------------|-----------------|-------|
| GENIE-DFCI-011222 | GENIE-DFCI-011222-11823  | MSI-H-BRAFV600E | NA    |
| GENIE-DFCI-026326 | GENIE-DFCI-026326-48545  | MSI-H-BRAFV600E | NA    |
| GENIE-DFCI-000408 | GENIE-DFCI-000408-11450  | MSI-H-Lynch     | NA    |
| GENIE-DFCI-036772 | GENIE-DFCI-036772-75012  | MSI-H-BRAFV600E | NA    |
| GENIE-DFCI-034167 | GENIE-DFCI-034167-74854  | MSI-H-BRAFV600E | NA    |
| GENIE-DFCI-001131 | GENIE-DFCI-001131-11269  | MSI-H-BRAFV600E | NA    |
| GENIE-DFCI-010603 | GENIE-DFCI-010603-9978   | MSS-MAPK        | ALK   |
| GENIE-DFCI-037398 | GENIE-DFCI-037398-74706  | MSI-H-MAPK      | NTRK  |
| GENIE-DFCI-013270 | GENIE-DFCI-013270-23816  | MSI-H-Lynch     | NA    |
| GENIE-DFCI-010632 | GENIE-DFCI-010632-10572  | MSI-H-BRAFV600E | NA    |
| GENIE-DFCI-048397 | GENIE-DFCI-048397-173776 | MSI-H-BRAFV600E | NA    |
| GENIE-DFCI-090146 | GENIE-DFCI-090146-266229 | MSI-H-BRAFV600E | NA    |
| GENIE-DFCI-094284 | GENIE-DFCI-094284-710704 | MSI-H-BRAFV600E | NA    |
| GENIE-DFCI-040235 | GENIE-DFCI-040235-188644 | MSI-H-MAPK      | NTRK  |
| GENIE-DFCI-109336 | GENIE-DFCI-109336-436649 | MSS-Wnt         | RSPO3 |

|                   |                          |                 |       |
|-------------------|--------------------------|-----------------|-------|
| GENIE-DFCI-093572 | GENIE-DFCI-093572-436863 | MSI-H-MAPK      | RET   |
| GENIE-DFCI-090476 | GENIE-DFCI-090476-332679 | MSI-H-BRAFV600E | NA    |
| GENIE-DFCI-051635 | GENIE-DFCI-051635-173768 | MSI-H-BRAFV600E | NA    |
| GENIE-DFCI-050749 | GENIE-DFCI-050749-173868 | MSI-H-Lynch     | NA    |
| GENIE-DFCI-053471 | GENIE-DFCI-053471-203560 | MSI-H-BRAFV600E | NA    |
| GENIE-DFCI-051206 | GENIE-DFCI-051206-218966 | MSI-H-BRAFV600E | NA    |
| GENIE-DFCI-080992 | GENIE-DFCI-080992-282566 | MSI-H-BRAFV600E | NA    |
| GENIE-DFCI-078731 | GENIE-DFCI-078731-282097 | MSI-H-Lynch     | NA    |
| GENIE-DFCI-075877 | GENIE-DFCI-075877-298981 | MSI-H-Lynch     | NA    |
| GENIE-DFCI-089869 | GENIE-DFCI-089869-350896 | MSI-H-MAPK      | NTRK  |
| GENIE-DFCI-108474 | GENIE-DFCI-108474-437249 | MSS-Wnt         | RSPO3 |
| GENIE-DFCI-108385 | GENIE-DFCI-108385-436918 | MSI-H-BRAFV600E | NA    |
| GENIE-DFCI-109546 | GENIE-DFCI-109546-437267 | MSS-Wnt         | RSPO3 |
| GENIE-DFCI-095111 | GENIE-DFCI-095111-526448 | MSI-H-BRAFV600E | NA    |
| GENIE-DFCI-090505 | GENIE-DFCI-090505-299076 | MSI-H-MAPK      | BRAF  |

|                   |                           |                 |       |
|-------------------|---------------------------|-----------------|-------|
| GENIE-DFCI-049001 | GENIE-DFCI-049001-188660  | MSS-MAPK        | FGFR2 |
| GENIE-DFCI-047001 | GENIE-DFCI-047001-249650  | MSI-H-BRAFV600E | NA    |
| GENIE-DFCI-095498 | GENIE-DFCI-095498-617835  | MSI-H-Lynch     | NA    |
| GENIE-DFCI-107816 | GENIE-DFCI-107816-437112  | MSS-Wnt         | RSPO3 |
| GENIE-DFCI-101032 | GENIE-DFCI-101032-437131  | MSI-H-BRAFV600E | NA    |
| GENIE-DFCI-038987 | GENIE-DFCI-038987-234186  | MSI-H-MAPK      | RET   |
| GENIE-DFCI-093804 | GENIE-DFCI-093804-436973  | MSI-H-BRAFV600E | NA    |
| GENIE-DFCI-111370 | GENIE-DFCI-111370-617780  | MSI-H-Lynch     | NA    |
| GENIE-DFCI-108472 | GENIE-DFCI-108472-526288  | MSI-H-Lynch     | NA    |
| GENIE-DFCI-050991 | GENIE-DFCI-050991-203536  | MSS-Wnt         | RSPO3 |
| GENIE-DFCI-092813 | GENIE-DFCI-092813-282053  | MSS-Wnt         | RSPO3 |
| GENIE-DFCI-087455 | GENIE-DFCI-087455-266370  | MSI-H-BRAFV600E | NA    |
| GENIE-DFCI-148146 | GENIE-DFCI-148146-1525798 | MSI-H-Lynch     | NA    |
| GENIE-DFCI-118359 | GENIE-DFCI-118359-757698  | MSS-MAPK        | NRG1  |
| GENIE-DFCI-136048 | GENIE-DFCI-136048-1099701 | MSI-H-BRAFV600E | NA    |

|                   |                           |                 |       |
|-------------------|---------------------------|-----------------|-------|
| GENIE-DFCI-132242 | GENIE-DFCI-132242-1469723 | MSI-H-BRAFV600E | NA    |
| GENIE-DFCI-168441 | GENIE-DFCI-168441-1786805 | MSI-H-Lynch     | NA    |
| GENIE-DFCI-094914 | GENIE-DFCI-094914-901995  | MSI-H-BRAFV600E | NA    |
| GENIE-DFCI-113227 | GENIE-DFCI-113227-950834  | MSI-H-Lynch     | NA    |
| GENIE-DFCI-136454 | GENIE-DFCI-136454-1049720 | MSI-H-BRAFV600E | NA    |
| GENIE-DFCI-174511 | GENIE-DFCI-174511-1729387 | MSI-H-Lynch     | NA    |
| GENIE-DFCI-118438 | GENIE-DFCI-118438-805357  | MSS-Wnt         | RSPO3 |
| GENIE-DFCI-136476 | GENIE-DFCI-136476-1304448 | MSI-H-Lynch     | NA    |
| GENIE-DFCI-124208 | GENIE-DFCI-124208-1358755 | MSI-H-MAPK      | ALK   |
| GENIE-DFCI-111511 | GENIE-DFCI-111511-757556  | MSI-H-BRAFV600E | NA    |
| GENIE-DFCI-183743 | GENIE-DFCI-183743-2839119 | MSI-H-Lynch     | NA    |
| GENIE-DFCI-203700 | GENIE-DFCI-203700-2518580 | MSI-H-Lynch     | NA    |
